# Supplementary material for: Combined effects of graphene oxide and zinc oxide nanoparticle on human A549 cells: bioavailability, toxicity and mechanisms
Source: Royal Society of Chemistry journal article supplement (doi:10.1039/c8en00965a), 2019-01-01
Supplement: c8en00965a1.pdf [file c8en00965a1.pdf]

**Supporting information for**

**Combined effects of graphene oxide and zinc oxide nanoparticle on human A549 cells: Bioavailability, toxicity and mechanisms**

Bing Wu,\* Jialu Wu, Su Liu, Zhuoyan Shen, Ling Chen, Xu-Xiang Zhang, Hong-qiang Ren

State Key Laboratory of Pollution Control and Resource Reuse, School of the Environment, Nanjing University, Nanjing, 210023, P.R. China

\* Corresponding author:

E-mail: [bwu@nju.edu.cn](mailto:bwu@nju.edu.cn)

Address: 163 Xianlin Avenue, Nanjing, 210023, P.R. China

## **Methods**

### **Analysis of Zn<sup>2+</sup> adsorption by GO**

The 20 mg/L Zn<sup>2+</sup> solution was prepared by zinc sulfate in RPMI-1640 media with 0, 1, 5 and 10 mg/L GO, respectively. The mixture was stirred and shaken for 24 h at 180 rpm and 37°C. Then the samples were collected at 0, 10, 20, 60, 180, 480, and 1440 min with three replicates for the measurement of Zn<sup>2+</sup> concentration. GO and adsorbed Zn<sup>2+</sup> in the samples was removed by Nanosep. The concentrations of Zn<sup>2+</sup> were measured by FAAS.

## Figures

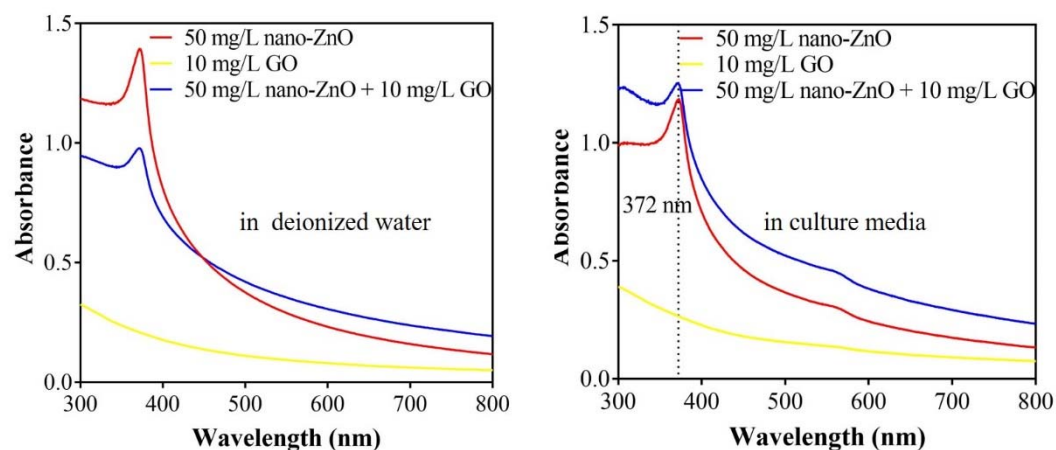

**Figure S1** Characteristic peak of nano-ZnO with or without GO in the deionized water (left) and culture media (right) measured by UV-vis spectrophotometer.

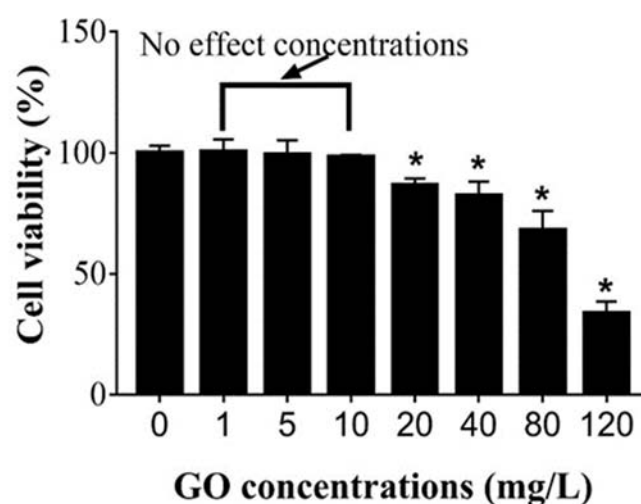

**Figure S2** Cell viability of A549 cells exposed by GO alone. All data were expressed as the mean  $\pm$  SD. All differences were identified by one-way ANOVA followed by Tukey post hoc test. \* indicates  $p$ -value  $<0.05$  compared with the control (0 mg/L) group.

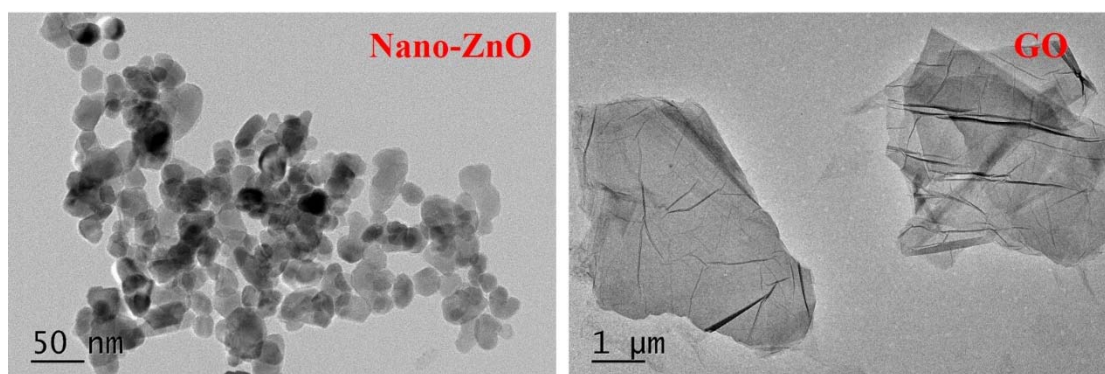

**Figure S3** TEM images of nano-ZnO and GO used in this study.

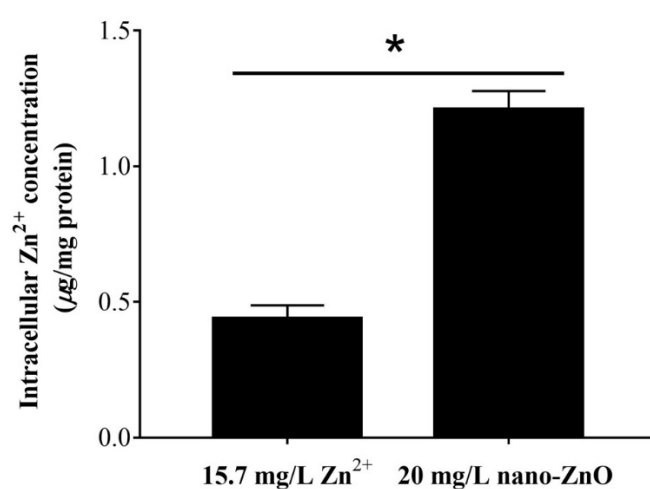

**Figure S4** Accumulation of Zn<sup>2+</sup> in A549 cells after nano-ZnO and zinc sulfate exposure. The Zn concentrations were normalized by the protein concentrations. The exposure concentrations of nano-ZnO and zinc sulfate were 20 mg/L and 15.7 mg/L, respectively, which had an equivalent of zinc contents. All data were expressed as the mean  $\pm$  SD. Difference was identified by t-test. \* indicates  $p$ -value  $<0.05$ .

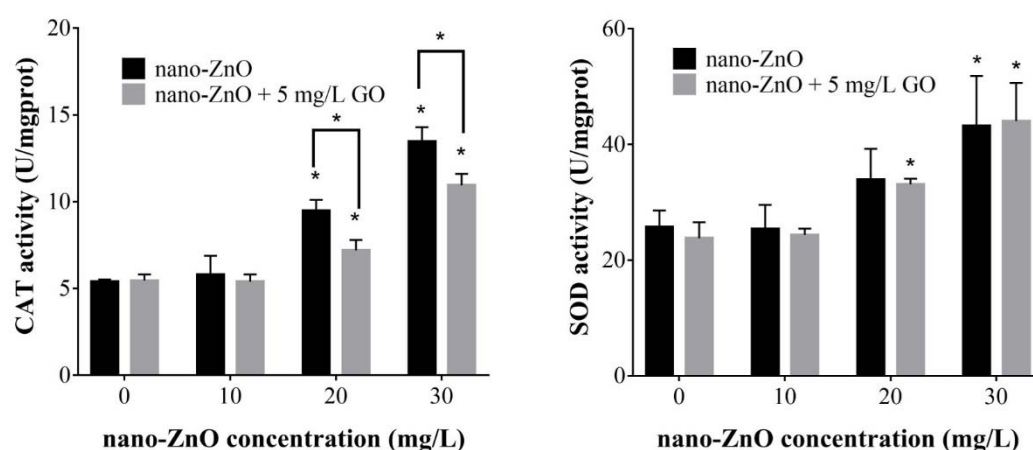

**Figure S5** Influence of GO on activities of CAT and SOD in A549 cells. All data were expressed as the mean  $\pm$  SD. All differences were identified by one-way ANOVA followed by Tukey post hoc test. \* indicates  $p$ -value  $< 0.05$  compared with the control group (0 mg/L) or between two special groups.

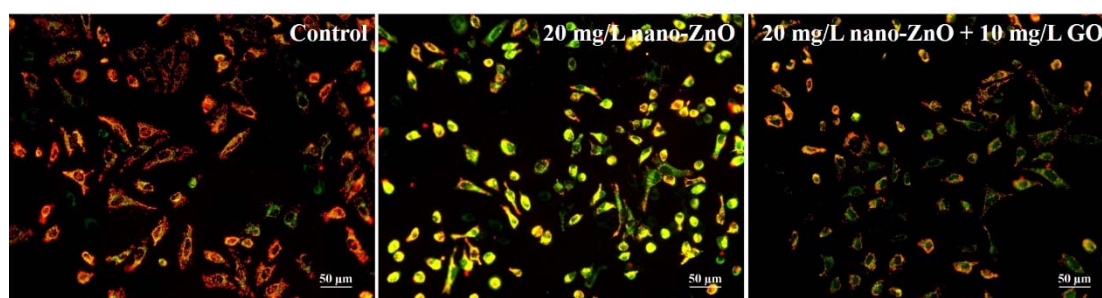

**Figure S6** Fluorescence images of A549 cells taken by microscopy in the control, nano-ZnO-alone exposure and coexposure groups. The exposure concentrations of nano-ZnO and GO were 20 mg/L and 10 mg/L, respectively. Increase of green fluorescence indicates the mitochondrial depolarization.

## Tables

**Table S1** Z-average diameters of nano-ZnO and GO in deionized water and RPMI 1640 media determined by dynamic light scattering

|          | Z-average diameter in deionized water (nm) | Z-average diameter in RPMI 1640 media (nm) |
|----------|--------------------------------------------|--------------------------------------------|
| nano-ZnO | 290.4                                      | 67.75                                      |
| GO       | 3714                                       | 658.8                                      |

**Table S2** The 40 hydrophilic metabolites and 20 lipophilic metabolites identified in A549 cells

| Hydrophilic metabolites |                           |    |                          | Lipophilic metabolites |                                                                   |
|-------------------------|---------------------------|----|--------------------------|------------------------|-------------------------------------------------------------------|
| 1                       | Ketoleucine               | 21 | Creatinine               | 1                      | Cholesterol C-18                                                  |
| 2                       | L-Isoleucine              | 22 | L-Lysine                 | 2                      | Cholesterol C-26                                                  |
| 3                       | (R)-3-Hydroxybutyric acid | 23 | Phosphocreatine          | 3                      | Cholesterol C-27                                                  |
| 4                       | Isobutyric acid           | 24 | Phosphorylcholine        | 4                      | Fatty acyl chain terminal CH <sub>3</sub>                         |
| 5                       | Lactate                   | 25 | Acetylcholine            | 5                      | Cholesterol C-21                                                  |
| 6                       | L-Alanine                 | 26 | Trimethylamine N-oxide   | 6                      | Cholesterol C-19                                                  |
| 7                       | Acetic acid               | 27 | 3,7-Dimethyluric acid    | 7                      | Fatty acyl chain (CH <sub>2</sub> ) <sub>n</sub>                  |
| 8                       | Glutamine                 | 28 | Taurine                  | 8                      | Cholesterol ester                                                 |
| 9                       | L-Methionine              | 29 | Glycine                  | 9                      | Fatty acyl chain –CH <sub>2</sub> CH=                             |
| 10                      | Glutamate                 | 30 | Ethanol                  | 10                     | Free fatty acids                                                  |
| 11                      | (S)-Malate                | 31 | Phenylacetyl glycine     | 11                     | Fatty acyl chain =CHCH <sub>2</sub> CH=                           |
| 12                      | Succinate                 | 32 | Dimethylglycine          | 12                     | Sphingomyelin N(CH <sub>3</sub> ) <sub>3</sub>                    |
| 13                      | 2-Oxoglutarate            | 33 | trans-Aconitic acid      | 13                     | Phosphatidylcholine N(CH <sub>3</sub> ) <sub>3</sub>              |
| 14                      | Pyruvate                  | 34 | Glutathione              | 14                     | Phosphatidylethanolamine Glyceryl CH <sub>2</sub> sn <sub>3</sub> |
| 15                      | Citrate                   | 35 | ATP/AMP/ADP              | 15                     | Phosphatidylcholine Glyceryl CH <sub>2</sub> sn <sub>3</sub>      |
| 16                      | Spermidine                | 36 | L-Gulonolactone          | 16                     | Glycerol backbone C-1 H <sub>2</sub> /C-3 H <sub>2</sub>          |
| 17                      | L-Aspartic acid           | 37 | D-Glucose                | 17                     | Phospholipid glycerol backbone C-2 H <sub>2</sub>                 |
| 18                      | Sarcosine                 | 38 | Uridine 5'-monophosphate | 18                     | Triglycerides glycerol backbone C-2 H <sub>2</sub>                |
| 19                      | L-Asparagine              | 39 | 3-Methyladenine          | 19                     | Fatty acyl chain –HC=CH–                                          |
| 20                      | Trimethylamine            | 40 | Formate                  | 20                     | PTE plasmalogen                                                   |

**Table S3** Significantly changed metabolites and their fold changes in A549 cells after nano-ZnO and/or GO exposure groups

| Metabolites            | 10 mg/L GO | 20 mg/L nano-ZnO | 20 mg/L nano-ZnO + 10 mg/L GO |
|------------------------|------------|------------------|-------------------------------|
| Citrate                | \          | 0.656533         | 0.677874                      |
| Acetylcholine          | \          | 0.680969         | 0.730527                      |
| Spermidine             | \          | 0.564072         | 0.594175                      |
| L-Gulonolactone        | \          | 0.417023         | 0.5821                        |
| Pyruvate               | 0.76698    | 1.565182         | 1.517903                      |
| L-Isoleucine           | \          | 2.487334         | 1.965886                      |
| Phosphorylcholine      | \          | 0.709965         | 0.803116                      |
| Glutathione            | \          | 0.78852          | \                             |
| Trimethylamine         | \          | 0.56313          | 0.632374                      |
| Creatinine             | \          | 0.65399          | 0.724582                      |
| L-Lysine               | \          | 0.662265         | 0.739519                      |
| Trimethylamine N-oxide | \          | 0.754242         | 0.85486                       |
| Ketoleucine            | \          | 0.754242         | \                             |
| L-Methionine           | \          | 0.804503         | 0.818963                      |
| Glutamate              | \          | 0.777401         | 0.825202                      |
| Glutamine              | \          | 0.837244         | 0.852399                      |
| 3-Methyladenine        | \          | 0.776539         | \                             |
| Glycine                | \          | \                | 1.308351                      |
| ATP/ADP/AMP            | \          | 0.67038          | \                             |
| Dimethylglycine        | \          | \                | 1.710787                      |



**Table S4** The KEGG pathway annotation of altered metabolites in the nano-ZnO-alone exposure and the coexposure groups

| Class                           | Pathway                                     | Match rate | <i>p</i> -value |
|---------------------------------|---------------------------------------------|------------|-----------------|
| Translation                     | Aminoacyl-tRNA biosynthesis                 | 6/75       | 2.80E-05        |
| Metabolism of other amino acids | D-Glutamine and D-glutamate metabolism      | 2/11       | 0.0038039       |
| Metabolism of other amino acids | Glutathione metabolism                      | 4/38       | 2.61E-04        |
| Energy metabolism               | Methane metabolism                          | 3/34       | 0.0028797       |
| Energy metabolism               | Nitrogen metabolism                         | 3/39       | 0.0042761       |
| Carbohydrate metabolism         | Citrate cycle (TCA cycle)                   | 2/20       | 0.012534        |
| Carbohydrate metabolism         | Glycolysis or Gluconeogenesis               | 2/31       | 0.028958        |
| Carbohydrate metabolism         | Butanoate metabolism                        | 2/40       | 0.046347        |
| Carbohydrate metabolism         | Ascorbate and aldarate metabolism           | 2/45       | 0.057315        |
| Carbohydrate metabolism         | Glyoxylate and dicarboxylate metabolism     | 2/50       | 0.069103        |
| Carbohydrate metabolism         | Pentose phosphate pathway                   | 2/32       | 0.030727        |
| Amino acid metabolism           | Alanine, aspartate and glutamate metabolism | 3/24       | 0.0010304       |
| Amino acid metabolism           | Glycine, serine and threonine metabolism    | 3/48       | 0.0076938       |
| Amino acid metabolism           | Cysteine and methionine metabolism          | 3/56       | 0.011789        |
| Amino acid metabolism           | Lysine degradation                          | 2/47       | 0.061937        |
| Amino acid metabolism           | Arginine and proline metabolism             | 5/77       | 4.01E-04        |
| Amino acid metabolism           | Valine, leucine and isoleucine biosynthesis | 3/27       | 0.0014641       |
| Amino acid metabolism           | Valine, leucine and isoleucine degradation  | 2/40       | 0.046347        |
| Nucleotide metabolism           | Purine metabolism                           | 3/92       | 0.043656        |
| Lipid metabolism                | Glycerophospholipid metabolism              | 2/39       | 0.044259        |
